# Supplementary material for: Investigating the Mechanism of Scutellariae barbata Herba in the Treatment of Colorectal Cancer by Network Pharmacology and Molecular Docking
Source: Hindawi journal article supplement (doi:10.1155/2021/3905367), 2021-08-02

Supplementary Table S1. Top 10 Active constituents and targets sorted by degree

| Active constituent                                  | Degree | BetweennessCentrality | Target   | Degree | BetweennessCentrality |
|-----------------------------------------------------|--------|-----------------------|----------|--------|-----------------------|
| quercetin                                           | 147    | 0.4228802             | NR3C1    | 24     | 0.1294543             |
| luteolin                                            | 93     | 0.2227119             | HSD11B2  | 22     | 0.0068073             |
| wogonin                                             | 55     | 0.0763245             | PTGS2    | 21     | 0.0767229             |
| Apigenin                                            | 40     | 0.0648765             | CYP27B1  | 21     | 0.0045999             |
| beta-sitosterol                                     | 37     | 0.0774998             | PTGS1    | 19     | 0.0324061             |
| baicalein                                           | 37     | 0.0557213             | HSP90AA1 | 18     | 0.0264951             |
| Stigmasterol                                        | 31     | 0.0741788             | FNTA     | 18     | 0.0032711             |
| 7-hydroxy-5,8-dimethoxy-2-phenyl-chromone           | 26     | 0.0097444             | AVPR1B   | 18     | 0.0032535             |
| 5-hydroxy-7,8-dimethoxy-2-(4-methoxyphenyl)chromone | 26     | 0.0147921             | SRD5A1   | 17     | 0.0018075             |
| Moslosooflavone                                     | 25     | 0.0088645             | FABP6    | 17     | 0.0029422             |

Supplementary Figure S1. SBH active constituent-target network. Hexagonal nodes represent the active constituents of SBH and round nodes represent the related targets

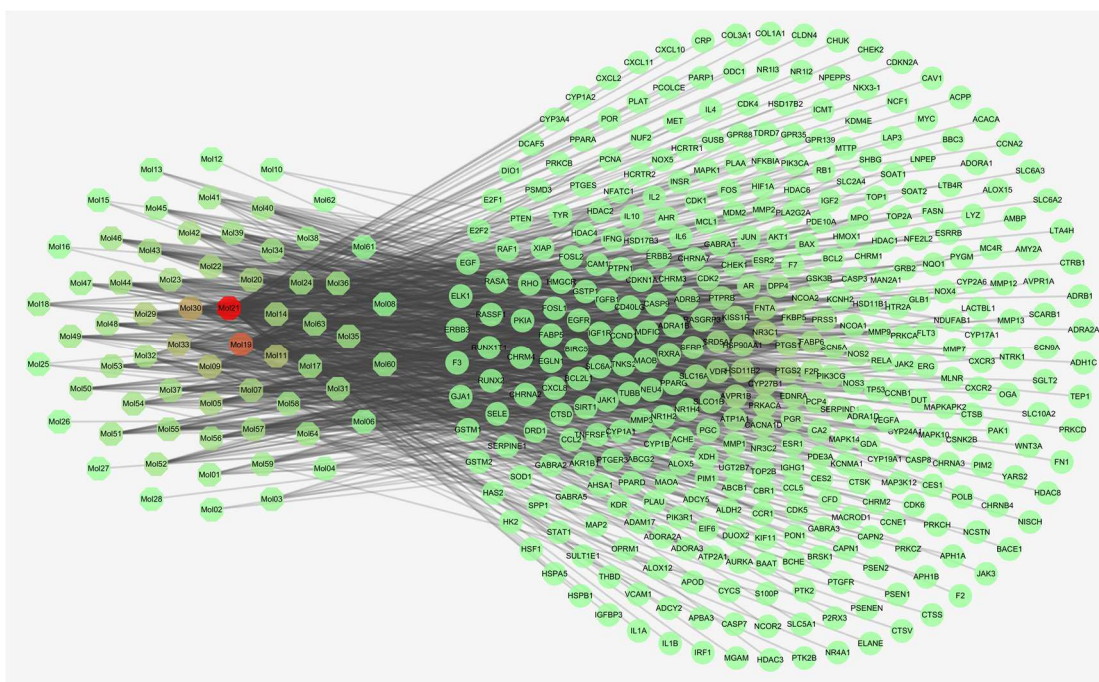

Supplement: f1 [file 3905367.f1.pdf]
